# Supplementary material for: Accelerating the search for the missing proteins in the human proteome
Source: PubMed Central journal article supplement (PMC5286205; doi:10.1038/ncomms14271), 2017-01-24
Supplement: ncomms14271-s1.pdf [file ncomms14271-s1.pdf]

1  
2

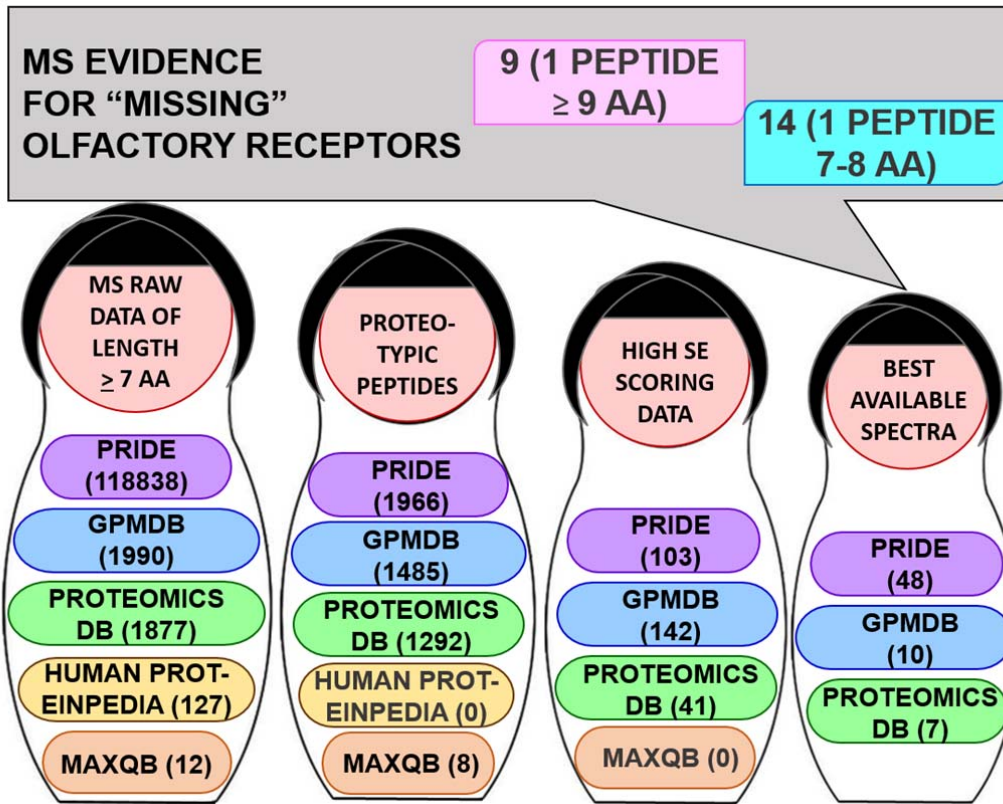

3  
4  
5  
6  
7  
8  
9  
10  
11

**Supplementary Figure 1:** Process used to hunt for missing human olfactory receptors using data from many publicly-available MS proteomic repositories, by computational identification of prototypic and high search engine (SE) scoring data for manual spectral quality check. Resulting best available spectral data were checked for sequence overlaps and then listed as most plausible of the best available MS evidence for missing ORs (details available in Supplementary Table 2).

12 **Supplementary Table 1:** Historical Efforts to Find the Missing Proteins – A PE2-4 HPP  
 13 FactCheck (2012-current):  
 14 Abbreviations: DAVID, Database for Annotation, Visualisation and Integrated Discovery; GRAVY;  
 15 grand average of hydropathy;  $M_r$ , molecular mass;  $pI$ , isoelectric point; PRIDE, Proteomics  
 16 IDentifications database; PXD; ProteomeXchange identifier.  
 17

| Missing Protein (PE2-4) Characteristic            | Property or Question Addressed                                    | Missing proteins/total human proteome ( $\uparrow\downarrow$ )                                                                                                                                                                                                                                                                                                                                                                                                                                                                                                             | Ref. |
|---------------------------------------------------|-------------------------------------------------------------------|----------------------------------------------------------------------------------------------------------------------------------------------------------------------------------------------------------------------------------------------------------------------------------------------------------------------------------------------------------------------------------------------------------------------------------------------------------------------------------------------------------------------------------------------------------------------------|------|
| Physicochemical Properties                        | $pI$ , $M_r$ , GRAVY, hydrophobicity                              | PE1/PE2 protein ratios: $pI$ $\downarrow$ $M_r$ $\uparrow$ GRAVY $\uparrow$<br>hydrophobicity $\downarrow$                                                                                                                                                                                                                                                                                                                                                                                                                                                                 | 1    |
|                                                   | Hydrophobicity and transmembrane domains                          | 1,224 were identified by modified 'hppk' analysis of human lymphoma cell lines out of which 2/3 were integral membrane proteins with 1-16 transmembrane segments. 13 missing proteins were identified which were previously in PE 2-5 categories. 7 out of these 13 proteins are Integral membrane proteins with 2-7 transmembrane domains. FDR 0.01 and validation based on q value                                                                                                                                                                                       | 2    |
|                                                   | Endopeptidase digestion                                           | 4 human proteins cannot produce a single proteotypic (tryptic) peptide with 36 not producing tryptic peptides in the 9-30 amino acid range usually "seen" by MS. No analysis using PE1 metrics (i.e., 2 x >9 amino acid proteotypic peptides) was conducted. Combination "Confetti" endopeptidase digestion predicted to increase coverage. Physical data comparisons difficult, as their definition (PE2-5) is not aligned with current HPP/neXtProt missing protein nomenclature (i.e., PE2-4 proteins are the missing proteins).                                        | 3    |
|                                                   |                                                                   |                                                                                                                                                                                                                                                                                                                                                                                                                                                                                                                                                                            |      |
| Protein Family, Subfamily or Biological Processes | Membrane (PXD $\checkmark$ )                                      | Found 178 missing proteins expressed by 11 NSCL cancer cell lines, of which 74 were membrane proteins); 1% FDR $\geq 7aa$ , protein & peptide, GPCRs and Ig- like and P-loop containing NTPase zinc-finger proteins                                                                                                                                                                                                                                                                                                                                                        | 4    |
|                                                   | Membrane                                                          | PE5 proteins predicted (I-TASSER; COFACTOR) to be membrane/cell surface (transporter/receptor) and peptide fold families                                                                                                                                                                                                                                                                                                                                                                                                                                                   | 5    |
|                                                   | Tissue distribution, cellular components and biological processes | Manual curation of biological processes shows PE2-4 bias towards enriched zinc finger, GPCR (incl. olfactory receptors) and cadherin proteins. Data not condensed/quantitated. GO, Ingenuity IPA, neXtProt descriptor, PFAM and GPCR phylogeny remains to be done                                                                                                                                                                                                                                                                                                          | 6    |
| Genetic or Evolutionary Aspects                   | Chromosomal Geography                                             | <a href="http://proteomebrowser.org/tpb/home.jspx">http://proteomebrowser.org/tpb/home.jspx</a><br>This web portal driven by the AANZ Chr 7 team, brings together data and information about human proteins from a number of sources and presents them in a gene- and chromosome-centric, interactive format                                                                                                                                                                                                                                                               | 7    |
|                                                   | Distribution PE2-4 across chromosomes                             | Genes for PE2-4 are not distributed evenly across human chromosomes or their regions. PE3/4 genes found outside conserved chromosomal regions. PE2-4 proteins tend to emerge at the telomere and centromere regions (more fragile experiencing breakage and rearrangement) and are adjacent to other protein coding genes but not adjacent to other PE-2-4 coding genes. PE2-4 gene "clusters" tend to have similar functional descriptors. PE3/4 genes have higher tendency to be "young" (related to latest common ancestor) and less conserved across different species | 8    |

| Missing Protein (PE2-4) Characteristic               | Property or Question Addressed                                                                                                                                                                          | Missing proteins/total human proteome (↑↓)                                                                                                                                                                                                      | Ref. |
|------------------------------------------------------|---------------------------------------------------------------------------------------------------------------------------------------------------------------------------------------------------------|-------------------------------------------------------------------------------------------------------------------------------------------------------------------------------------------------------------------------------------------------|------|
| Genetic or Evolutionary Aspects                      | Chromosomal                                                                                                                                                                                             | According to chromosomal files downloadable from neXtProt, PE2-4s are located on all 22 Chr pairs as well as X and Y, except MT. There are 2 MT proteins that fall into the PE1 category but lack proteomic (MS) evidence                       | 9,10 |
|                                                      | Chr12 PE2-4 chromosomal localisation                                                                                                                                                                    | Suggested co-localisation of Chr12 PE2-4 proteins in close proximity to functionally-related genes, protein:protein interaction and disease networks. Patterns of PE2-4 gene localisation should be confirmed across other chromosomes          | 11   |
| Organ, Tissue, Cell or Disease                       | Testis (PXD✓)                                                                                                                                                                                           | PE2-4s restricted to particular tissues (e.g., testis, post-meiotic germ cells). Found evidence for 89 PE2-4s, 1% peptide FDR; peptide length not mentioned, validated 3 PE5 proteins, twelve Chr2/14 PE2-4s found                              | 12   |
|                                                      | Testis (PXD✓)                                                                                                                                                                                           | 3 human testis tissues; separated high and low Mr proteins; 166 PE2-4s identified by MS one $\geq 9$ aa and others $\geq 7$ aa, FDR,1% peptide & protein levels, transcriptomics shows PE2-4s; 108 PE2-4s (72% associated with disease (cancer) | 13   |
|                                                      | Testis                                                                                                                                                                                                  | Testicular tissues - 2 Chr Y PE2-4s by Western blotting; no MS                                                                                                                                                                                  | 14   |
|                                                      | Retina/Placental                                                                                                                                                                                        | Examined 2 cell lines - one replicate from each, 58 of 74 multi-isoform genes are expressed at protein level                                                                                                                                    | 15   |
|                                                      | Multi-tissues (PXD✓)                                                                                                                                                                                    | 30 different tissues; 89 PE2-4s identified on Chr12; size of peptides not mentioned; 1% FDR peptide only                                                                                                                                        | 16   |
|                                                      | HCC Cell lines                                                                                                                                                                                          | 3 HCC cell lines with mRNA cell line analysis; small $\beta$ -defensin (DEFB) PE2-4s' tryptic peptides will be very short; no other bias found; transcripts often not found as proteins                                                         | 17   |
|                                                      | Lymphoma Cell lines (PXD✓)                                                                                                                                                                              | 370 PE2-4s identified in any replicate, length of 1+ proteotypic peptide, length not mentioned; FDR <1% protein and PSM level, 32 PE2-4s identified across 3 replicates; only 4 PE2-4s when 2 proteotypic peptide across triplicates            | 18   |
|                                                      | Lung adenocarcinoma (PXD✓)                                                                                                                                                                              | Two PE2-4s identified; <1% peptide, $\geq 2$ proteotypic peptides, length no mentioned                                                                                                                                                          | 19   |
|                                                      | CRC Tissues (PXD✓)                                                                                                                                                                                      | Claim 3,033 PE2-4s found <1% peptide FDR at 1 proteotypic peptide, protein FDR and peptide length not mentioned                                                                                                                                 | 20   |
|                                                      | HCC cell lines                                                                                                                                                                                          | In 3 HCC cell lines, high % missing protein coding genes (especially Chr11) contain no mRNA identified evidence while Chr19 did show mRNA evidence. Need to shift search for to missing mRNAs                                                   | 21   |
| Cancer cell lines (epigenetically modified) (iProx✓) | Found 19 PE2-4 proteins and 3 PE5 proteins, <1% peptide & protein FDR, a unique proteolytic peptide of $\geq 8$ aa. These proteins had no physicochemical differences with background proteins          | 22                                                                                                                                                                                                                                              |      |
| HCC cell line/healthy sera (PXD/iProx✓)              | Separate high and low Mr subcellular fractionated proteins. 30 PE2-4 proteins identified at 1% FDR protein/peptide, >7aa from HCC cell lines (13) and from healthy sera (17), as well as 6 PE5 proteins | 23                                                                                                                                                                                                                                              |      |

| Missing Protein (PE2-4) Characteristic       | Property or Question Addressed                                                                                                                                                                                                                         | Missing proteins/total human proteome (↑↓)                                                                                                                                                                                                                                                                                                                                                                                                                                                                                                                            | Ref. |
|----------------------------------------------|--------------------------------------------------------------------------------------------------------------------------------------------------------------------------------------------------------------------------------------------------------|-----------------------------------------------------------------------------------------------------------------------------------------------------------------------------------------------------------------------------------------------------------------------------------------------------------------------------------------------------------------------------------------------------------------------------------------------------------------------------------------------------------------------------------------------------------------------|------|
| Organ, Tissue, Cell or Disease               | Breast cancer tissue (prior to HPP metrics)                                                                                                                                                                                                            | Propose PE2-4 proteins likely due to very low-abundance and/or absence of expression in given cells or tissues. Proteome Discoverer and DAVID analyses show % PE1 and PE2-4 total and membrane proteins. Ingenuity pathways analyses (see update in current work) demonstrated PE2-4 proteins involved in molecular/cellular processes like lipid metabolism, small molecule biochemistry, cell-cell signalling, haematological function & immune cell trafficking. Propose subcellular membrane protein enrichment will improve low-abundance PE2-4 protein coverage | 24   |
| New Approach or Technology                   | Antibodypedia                                                                                                                                                                                                                                          | Describe Antibodypedia as a curated, searchable database of Abs against human proteins. Ab coverage of the human genome graphically displayed on chromosome level (with validation and citation scoring criteria provided). 9% of human protein-coding genes lack Abs targeting any gene product and high redundancy in Abs against certain proteins exists. 5800 gene products have only 0–9 available Abs and are suggested as future focus                                                                                                                         | 25   |
|                                              | Can PE2-4s be expressed and detected by MS                                                                                                                                                                                                             | Cell-free in vitro transcription/translation IVTT allows expression of 18 missing proteins from Chr16                                                                                                                                                                                                                                                                                                                                                                                                                                                                 | 26   |
|                                              | MS CoPE2-4utational Analyses                                                                                                                                                                                                                           | Reanalyses from PRIDE identified 24 (17 were transmembrane proteins and 17 associated with secretory pathway) PE2-4s; 1+ proteotypic peptide, <1% protein FDR, peptide length not mentioned                                                                                                                                                                                                                                                                                                                                                                           | 27   |
|                                              | Multiple Spectral Library approach                                                                                                                                                                                                                     | Reanalysed placental PXD tissue dataset using multiple spectral libraries to identify 12 PE2-4 proteins, ≥two 7aa or one 9aa proteotypic peptides, FDRs not mentioned                                                                                                                                                                                                                                                                                                                                                                                                 | 28   |
|                                              | Modified MRM Approach (PXD✓)                                                                                                                                                                                                                           | Of 185 “targeted” PE2-4s 57 successfully detected using an MRM approach with synthetic peptide library                                                                                                                                                                                                                                                                                                                                                                                                                                                                | 29   |
|                                              | Complete reanalysis of neXtProt                                                                                                                                                                                                                        | 145 human proteins not expected to have proteotypic tryptic peptides (77 PE2-4, 58 PE1 and 10 PE5 proteins); length of peptides not mentioned. 58 neXtProt PE1 proteins that do not produce tryptic peptides emanate from highly similar protein evidence (40), experimental/functional characterisation (11), 3D structure (6) and binary interaction (1). Authors suggest need for review and possible use of Confetti, Ab and top-down MS approaches for proteins where tryptic digestion not anticipated                                                          | 30   |
|                                              | CoPE2-4lete reanalysis of Chr12 neXtProt, GPMDB, PeptideAtlas, HPA & Ensembl data                                                                                                                                                                      | 1,066 protein coding genes identified, including 171 PE2-4s (only 2 by MS, no metrics provided)                                                                                                                                                                                                                                                                                                                                                                                                                                                                       | 31   |
| Functional annotation of neXtProt PE2-4 Chr7 | New protocol integrating bioinformatics analysis and annotation tools, reporting mammalian homologues from sequential BLAST searches for 128 Chr 7 PE2-4 proteins and functional motifs, gene ontology and/or pathway analysis for another 27 proteins | 32                                                                                                                                                                                                                                                                                                                                                                                                                                                                                                                                                                    |      |

| Missing Protein (PE2-4) Characteristic | Property or Question Addressed                                                                                             | Missing proteins/total human proteome (↑↓)                                                                                                                                                                                                                                                                                                                                                                                                                                                         | Ref.                |
|----------------------------------------|----------------------------------------------------------------------------------------------------------------------------|----------------------------------------------------------------------------------------------------------------------------------------------------------------------------------------------------------------------------------------------------------------------------------------------------------------------------------------------------------------------------------------------------------------------------------------------------------------------------------------------------|---------------------|
|                                        | <p>Reanalysis of neXtProt PE2-4 Chr2 &amp; 14 (PXD✓)</p> <p>ProtAnnotator: functional annotation of all neXtProt PE2-4</p> | <p>Informatics reanalysis of neXtProt data found 58 Chr2 &amp; 14 PE2-4 proteins using &gt;6aa, MASCOT ion score <math>\geq 30</math>, 1% peptide FDR, SRM with synthetic peptides confirmation. Suggest PE1 status be confirmed.</p> <p><a href="http://www.biinfo.org/protannotator">www.biinfo.org/protannotator</a></p> <p>Semi-automated pipeline, extending the bioinformatics approach in ref. 32. Homologues identified for 66% of PE2-4 proteins, with functional annotation for 51%.</p> | <p>33</p> <p>34</p> |

20

21

22 **Supplementary Table 2: Currently assigned PE2-4 missing ORs with manually-curated,**  
 23 **best-available proteotypic peptide MS spectra.**

24 Details of neXtProt identifier (ID), chromosome (Chr) number, peptide identified, with its length and  
 25 start and end positions on protein sequence, number of MS observations (Obs.) and database(s)  
 26 where peptide spectral information has been deposited.

| #                                                                                                                                                                                                   | neXtProt ID | Chr | Gene Name | Peptides identified                          | Peptide length | Peptide position | No of Obs | Database/s Used     |
|-----------------------------------------------------------------------------------------------------------------------------------------------------------------------------------------------------|-------------|-----|-----------|----------------------------------------------|----------------|------------------|-----------|---------------------|
| ORs that <b>currently qualify</b> as PE1 proteins according to neXtProt Feb 2016 HPP high-stringency metrics ( $\geq 2$ uniquely mapping peptides $\geq 9$ residues)                                |             |     |           |                                              |                |                  |           |                     |
| NIL                                                                                                                                                                                                 |             |     |           |                                              |                |                  |           |                     |
| ORs that <b>previously qualified</b> as PE1 proteins according to 2015 HPP neXtProt metrics ( $\geq 2$ uniquely mapping peptides $\geq 7$ residues or 1 uniquely mapping peptide $\geq 9$ residues) |             |     |           |                                              |                |                  |           |                     |
| 1                                                                                                                                                                                                   | NX_Q8NGR6   | 9   | OR1B1     | <b>IGAILRLPSAAGR</b> <sup>@</sup>            | 14             | 227-240          | 1         | GPMDDB (yellow)     |
| 2                                                                                                                                                                                                   | NX_Q8NGA1   | 19  | OR1M1     | <b>ILVAIMKVP</b> <u>SAGGR</u> * <sup>#</sup> | 14             | 221-234          | 2         | GPMDDB (both green) |
| 3                                                                                                                                                                                                   | NX_Q8NGH9   | 11  | OR52E4    | <b>TISILASVVVGR</b> <sup>#</sup>             | 12             | 142-153          | 1         | PRIDE               |
| 4                                                                                                                                                                                                   | NX_Q9H344   | 11  | OR51I2    | SVMATASREER                                  | 11             | 224-236          | 4         | PRIDE               |
| 5                                                                                                                                                                                                   | NX_Q8NH03   | 1   | OR2T3     | <b>SAAGHRKAL</b> <sup>#</sup>                | 9              | 235-243          | 2         | GPMDDB (red)        |
| 6                                                                                                                                                                                                   | NX_P0C629   | 1   | OR10J4    | DALLRALGR                                    | 9              | 299-307          | 1         | PRIDE               |
| 7                                                                                                                                                                                                   | NX_Q8NH61   | 11  | OR51F2    | LYVVAVSGN                                    | 9              | 48-56            | 1         | GPMDDB (red)        |
| 8                                                                                                                                                                                                   | NX_Q8N162   | 11  | OR8H2     | NAVIRVMQR                                    | 9              | 299-308          | 1         | PRIDE               |
| 9                                                                                                                                                                                                   | NX_Q8WZA6   | 17  | OR1E3     | <b>VPSTGGIQK</b> <sup>#</sup>                | 9              | 228-236          | 2         | PRIDE               |
| ORs that <b>did not previously and do not currently qualify</b> as PE1 proteins according to 2016 HPP neXtProt high-stringency metrics (i.e., only 1 uniquely mapping 7-8 residue peptide)          |             |     |           |                                              |                |                  |           |                     |
| 10                                                                                                                                                                                                  | NX_O95047   | 6   | OR2A4     | <b>GDNITSIR</b> <sup>#</sup>                 | 8              | 2-9              | 1         | GPMDDB (red)        |
| 11                                                                                                                                                                                                  | NX_Q9Y5P1   | 11  | OR51B2    | <b>QIQYGIIR</b> <sup>#</sup>                 | 8              | 296-303          | 1         | GPMDDB (red)        |
| 12                                                                                                                                                                                                  | NX_O95221   | 11  | OR5F1     | <b>ALANVISR</b> <sup>#</sup>                 | 8              | 300-307          | 1         | PROTEOMICSDB        |
| 13                                                                                                                                                                                                  | NX_Q8NGG7   | 11  | OR8A1     | EVKAAVQK                                     | 8              | 312-319          | 1         | PROTEOMICSDB        |
| 14                                                                                                                                                                                                  | NX_Q8NGG2   | 11  | OR5T2     | <b>FVLDFNMK</b> <sup>#</sup>                 | 8              | 36-43            | 1         | GPMDDB (red)        |
| 15                                                                                                                                                                                                  | NX_Q8NGJ8   | 11  | OR51S1    | ILNRLQPR                                     | 8              | 310-317          | 1         | PRIDE               |
| 16                                                                                                                                                                                                  | NX_Q9H2C8   | 11  | OR51V1    | <b>IGLTIIGR</b> <sup>#</sup>                 | 8              | 153-160          | 1         | PROTEOMICSDB        |
| 17                                                                                                                                                                                                  | NX_Q8NGE5   | 12  | OR10A7    | TVTLLGNF                                     | 8              | 36-43            | 1         | PROTEOMICSDB        |
| 18                                                                                                                                                                                                  | NX_Q8NGC5   | 14  | OR6J1     | MRAVLRSR                                     | 8              | 315-322          | 1         | PRIDE               |
| 19                                                                                                                                                                                                  | NX_Q8NGB8   | 15  | OR4F15    | KHKAI SFR                                    | 8              | 88-95            | 2         | PRIDE               |
| 20                                                                                                                                                                                                  | NX_Q8NGY6   | 1   | OR6N2     | <b>IIGAVLK</b> <sup>#</sup>                  | 7              | 221-227          | 1         | PROTEOMICSDB        |
| 21                                                                                                                                                                                                  | NX_Q9NZP5   | 3   | OR5AC2    | <b>VLF DILK</b> <sup>#</sup>                 | 7              | 223-229          | 35        | PRIDE, PROTEOMICSDB |
| 22                                                                                                                                                                                                  | NX_Q8NGR8   | 9   | OR1L8     | <b>ILTTVLK</b> <sup>#</sup>                  | 7              | 222-228          | 1         | PROTEOMICSDB        |
| 23                                                                                                                                                                                                  | NX_Q8NGC1   | 14  | OR11G2    | DMRKALK                                      | 7              | 334-340          | 1         | PRIDE               |

27 \* overlapping peptides with overlap underlined

28 # matches with SRM peptides shown in bold font, with partial overlaps shown in italics

29 @ contains two complete SRM peptides

30 **Supplementary Note 1: Brief description of the IL-9 proteomics experiment**

31 We carried out a secretome analysis of activated human T cells by performing a label-free bottom-  
32 up proteomic study of the conditioned medium of a primary cell culture. Viable naïve T cells were  
33 isolated as described before<sup>35</sup>. In order to minimize cell stress and to maintain them in good  
34 condition for several days, cells were cultured in conventional DMEM/F12 culture medium  
35 supplemented with 7.5% fetal bovine serum (FBS). Reduced and iodoacetamide alkylated proteins  
36 from the harvested cell supernatant were prefractionated on a C5 column, digested with trypsin and  
37 further analysed by data dependent nanoLC tandem MS on an ion trap/OrbiTrap mass spectrometer  
38 (LTQ OrbiTrap Velos (Thermo Fisher Scientific)). Conditioned media of activated as well as of resting  
39 T cells were collected at 6, 24 and 48 hours after the time of activation, and analysed in duplicate.  
40 The experiment yielded approximately 340,000 peptide spectral matches (representing 20% of all  
41 1.69 million tandem MS spectra recorded). Nearly 320,000 of these PSMs could be mapped to just  
42 over 100 bovine (i.e. FBS derived) proteins. Slightly less than 21,000 PSMs uniquely mapped to a  
43 little over 500 human protein groups. Only in the medium of the 48h activated T cells, PSMs  
44 referring to human IL-9 were detected, yielding the representative MS/MS spectra shown in Figure  
45 6.

46 **Supplementary References:**

47

48 1 Xu, S. *et al.* Appraisal of the Missing Proteins Based on the mRNAs Bound to  
49 Ribosomes. *Journal of Proteome Research* **14**, 4976-4984,  
50 doi:10.1021/acs.jproteome.5b00476 (2015).

51 2 Vit, O. *et al.* Large-scale identification of membrane proteins based on analysis of  
52 trypsin-protected transmembrane segments. *Journal of Proteomics*,  
53 doi:10.1016/j.jprot.2016.03.016 (2016).

54 3 Elguoshy, A. *et al.* Why are they missing? : Bioinformatics characterization of missing  
55 human proteins. *Journal of Proteomics*, doi:10.1016/j.jprot.2016.08.005 (2016).

56 4 Kitata, R. B. *et al.* Mining Missing Membrane Proteins by High-pH Reverse-Phase  
57 StageTip Fractionation and Multiple Reaction Monitoring Mass Spectrometry.  
58 *Journal of Proteome Research* **14**, 3658-3669, doi:10.1021/acs.jproteome.5b00477  
59 (2015).

60 5 Dong, Q., Menon, R., Omenn, G. S. & Zhang, Y. Structural Bioinformatics Inspection  
61 of neXtProt PE5 Proteins in the Human Proteome. *Journal of Proteome Research* **14**,  
62 3750-3761, doi:10.1021/acs.jproteome.5b00516 (2015).

63 6 Guruceaga, E., Sanchez del Pino, M. M., Corrales, F. J. & Segura, V. Prediction of a  
64 missing protein expression map in the context of the human proteome project.  
65 *Journal of Proteome Research* **14**, 1350-1360, doi:10.1021/pr500850u (2015).

66 7 Goode, R. J. *et al.* The proteome browser web portal. *Journal of Proteome Research*  
67 **12**, 172-178, doi:10.1021/pr3010056 (2013).

68 8 Xu, A. *et al.* Evolutionary Characteristics of Missing Proteins: Insights into the  
69 Evolution of Human Chromosomes Related to Missing-Protein-Encoding Genes.  
70 *Journal of Proteome Research* **14**, 4985-4994, doi:10.1021/acs.jproteome.5b00450  
71 (2015).

72 9 Gaudet, P. *et al.* neXtProt: organizing protein knowledge in the context of human  
73 proteome projects. *Journal of Proteome Research* **12**, 293-298,  
74 doi:10.1021/pr300830v (2013).

75 10 Lane, L. *et al.* neXtProt: a knowledge platform for human proteins. *Nucleic acids*  
76 *research* **40**, D76-83, doi:10.1093/nar/gkr1179 (2012).

77 11 Jayaram, S. *et al.* Insights from Chromosome-Centric Mapping of Disease-Associated  
78 Genes: Chromosome 12 Perspective. *Journal of Proteome Research* **14**, 3432-3440,  
79 doi:10.1021/acs.jproteome.5b00488 (2015).

80 12 Jumeau, F. *et al.* Human Spermatozoa as a Model for Detecting Missing Proteins in  
81 the Context of the Chromosome-Centric Human Proteome Project. *Journal of*  
82 *Proteome Research* **14**, 3606-3620, doi:10.1021/acs.jproteome.5b00170 (2015).

83 13 Zhang, Y. *et al.* Tissue-Based Proteogenomics Reveals that Human Testis Endows  
84 Plentiful Missing Proteins. *Journal of Proteome Research* **14**, 3583-3594,  
85 doi:10.1021/acs.jproteome.5b00435 (2015).

86 14 Ahmadi Rastegar, D. *et al.* Isoform-Level Gene Expression Profiles of Human Y  
87 Chromosome Azoospermia Factor Genes and Their X Chromosome Paralogs in the  
88 Testicular Tissue of Non-Obstructive Azoospermia Patients. *Journal of Proteome*  
89 *Research* **14**, 3595-3605, doi:10.1021/acs.jproteome.5b00520 (2015).

90 15 Li, H. D. *et al.* Functional Networks of Highest-Connected Splice Isoforms: From The  
91 Chromosome 17 Human Proteome Project. *Journal of Proteome Research* **14**, 3484-  
92 3491, doi:10.1021/acs.jproteome.5b00494 (2015).



93 16 Manda, S. S. *et al.* Identification and characterization of proteins encoded by  
94 chromosome 12 as part of chromosome-centric human proteome project. *Journal of*  
95 *Proteome Research* **13**, 3166-3177, doi:10.1021/pr401123v (2014).

96 17 Fan, Y. *et al.* Insights from ENCODE on Missing Proteins: Why beta-Defensin  
97 Expression Is Scarcely Detected. *Journal of Proteome Research* **14**, 3635-3644,  
98 doi:10.1021/acs.jproteome.5b00565 (2015).

99 18 Diez, P. *et al.* Integration of Proteomics and Transcriptomics Data Sets for the  
100 Analysis of a Lymphoma B-Cell Line in the Context of the Chromosome-Centric  
101 Human Proteome Project. *Journal of Proteome Research* **14**, 3530-3540,  
102 doi:10.1021/acs.jproteome.5b00474 (2015).

103 19 Kim, Y. I. *et al.* Proteogenomic Study beyond Chromosome 9: New Insight into  
104 Expressed Variant Proteome and Transcriptome in Human Lung Adenocarcinoma  
105 Tissues. *Journal of Proteome Research* **14**, 5007-5016,  
106 doi:10.1021/acs.jproteome.5b00544 (2015).

107 20 Shiromizu, T. *et al.* Identification of missing proteins in the neXtProt database and  
108 unregistered phosphopeptides in the PhosphoSitePlus database as part of the  
109 Chromosome-centric Human Proteome Project. *Journal of Proteome Research* **12**,  
110 2414-2421, doi:10.1021/pr300825v (2013).

111 21 Kong, N. *et al.* Assessing Transcription Regulatory Elements To Evaluate the  
112 Expression Status of Missing Protein Genes on Chromosomes 11 and 19. *Journal of*  
113 *Proteome Research* **14**, 4967-4975, doi:10.1021/acs.jproteome.5b00567 (2015).

114 22 Yang, L. *et al.* Finding Missing Proteins from the Epigenetically Manipulated Human  
115 Cell with Stringent Quality Criteria. *Journal of Proteome Research* **14**, 3645-3657,  
116 doi:10.1021/acs.jproteome.5b00480 (2015).

117 23 Su, N. *et al.* Special Enrichment Strategies Greatly Increase the Efficiency of Missing  
118 Proteins Identification from Regular Proteome Samples. *Journal of Proteome*  
119 *Research* **14**, 3680-3692, doi:10.1021/acs.jproteome.5b00481 (2015).

120 24 Muraoka, S. *et al.* In-depth membrane proteomic study of breast cancer tissues for  
121 the generation of a chromosome-based protein list. *Journal of Proteome Research*  
122 **12**, 208-213, doi:10.1021/pr300824m (2013).

123 25 Alm, T., von Feilitzen, K., Lundberg, E., Sivertsson, A. & Uhlen, M. A chromosome-  
124 centric analysis of antibodies directed toward the human proteome using  
125 Antibodypedia. *Journal of Proteome Research* **13**, 1669-1676,  
126 doi:10.1021/pr4011525 (2014).

127 26 Horvatovich, P. *et al.* In Vitro Transcription/Translation System: A Versatile Tool in  
128 the Search for Missing Proteins. *Journal of Proteome Research* **14**, 3441-3451,  
129 doi:10.1021/acs.jproteome.5b00486 (2015).

130 27 Kumar, D., Jain, A. & Dash, D. Probing the Missing Human Proteome: A  
131 Computational Perspective. *Journal of Proteome Research* **14**, 4949-4958,  
132 doi:10.1021/acs.jproteome.5b00728 (2015).

133 28 Cho, J. Y. *et al.* Combination of Multiple Spectral Libraries Improves the Current  
134 Search Methods Used to Identify Missing Proteins in the Chromosome-Centric  
135 Human Proteome Project. *Journal of Proteome Research* **14**, 4959-4966,  
136 doi:10.1021/acs.jproteome.5b00578 (2015).

137 29 Chen, C. *et al.* Screening of missing proteins in the human liver proteome by  
138 improved MRM-approach-based targeted proteomics. *Journal of Proteome Research*  
139 **13**, 1969-1978, doi:10.1021/pr4010986 (2014).

140 30 Choong, W. K. *et al.* Informatics View on the Challenges of Identifying Missing  
141 Proteins from Shotgun Proteomics. *Journal of Proteome Research* **14**, 5396-5407,  
142 doi:10.1021/acs.jproteome.5b00482 (2015).

143 31 Gupta, M. K. *et al.* Chromosome-centric human proteome project: deciphering  
144 proteins associated with glioma and neurodegenerative disorders on chromosome  
145 12. *Journal of Proteome Research* **13**, 3178-3190, doi:10.1021/pr500023p (2014).

146 32 Ranganathan, S. *et al.* Functional annotation of the human chromosome 7  
147 "missing"proteins: a bioinformatics approach. *Journal of Proteome Research* **12**,  
148 2504-2510, doi: 10.1021/pr301082p.

149 33 Carapito, C. *et al.* Computational and Mass-Spectrometry-Based Workflow for the  
150 Discovery and Validation of Missing Human Proteins: Application to Chromosomes 2  
151 and 14. *Journal of Proteome Research* **14**, 3621-3634, doi:10.1021/pr5010345  
152 (2015).

153 34 Islam, M. T. *et al.* Protannotator: a semiautomated pipeline for chromosome-wise  
154 functional annotation of the "missing" human proteome. *Journal of Proteome  
155 Research* **13**, 76-83, doi: 10.1021/pr400794x.

156 35 Finoulst, I. *et al.* Identification of low abundant secreted proteins and peptides from  
157 primary culture supernatants of human T-cells. *Journal of Proteomics* **75**, 23-33, doi:  
158 10.1016/j.jprot.2011.03.034 (2011).

159
